# Supplementary material for: Characterizing Covariant Trajectories of Individuals at Clinical High Risk for Psychosis Across Symptomatic and Functional Domains
Source: Atypon-hosted journal article supplement (doi:10.1176/appi.ajp.2019.18111290), 2019-09-06
Supplement: appi.ajp.2019.18111290.ds001.pdf [file appi.ajp.2019.18111290.ds001.pdf]

 


Psychiatry Online
